# Supplementary material for: Comparative Transcriptome Analysis of MeJA Responsive Enzymes Involved in Phillyrin Biosynthesis of Forsythia suspensa
Source: MDPI journal article supplement (doi:10.3390/metabo12111143), 2022-11-20
Supplement: s1 [file s1]

**Supplementary Table S1. qRT-PCR primer information**

| Gene Name                           | Unigene name          | amplicon size (bp) | Primer name | Primer sequences (5'-3') |
|-------------------------------------|-----------------------|--------------------|-------------|--------------------------|
| <i>FsUGT</i>                        | TRINITY_DN13484_c0_g1 | 239                | qUGT-F      | AGCTTGTGGTCTGAATCGGA     |
|                                     |                       |                    | qUGT-R      | AGCCCTCGATCCTTCATACG     |
| <i>FsOMT</i>                        | TRINITY_DN12053_c0_g1 | 153                | qOMT-F      | ATGCGAAAATTTGCAGGGAAG    |
|                                     |                       |                    | qOMT-R      | CCAGCAGCAGGAAAAAAGAGA    |
| <i>FsCCoAO MT</i>                   | TRINITY_DN972_c0_g1   | 180                | qCCoAOMT-F  | CAAATGATTGAAGATGGGAAGA   |
|                                     |                       |                    | qCCoAOMT-R  | CAATGGTGCATCAGGTGG       |
| <i>FsDIR</i>                        | TRINITY_DN448_c0_g1   | 196                | qDIR-F      | TCAGGCGATTGACAAACAGC     |
|                                     |                       |                    | qDIR-R      | ATCCATAACAAAGACCGCGC     |
| <i>FsC3H</i>                        | TRINITY_DN4745_c0_g2  | 264                | qC3H-F      | GGAGCCCATCAAGGAGCAAT     |
|                                     |                       |                    | qC3H-R      | TGGCATCTTCCGAGTGTGTG     |
| <i>Fs4CL</i>                        | TRINITY_DN9140_c0_g2  | 156                | q4CL-F      | GAAGTCGGCTGATGTGGTTC     |
|                                     |                       |                    | q4CL-R      | ACGCGGTACCTCTGTATCAG     |
| <i>FsCAD</i>                        | TRINITY_DN14607_c0_g1 | 150                | qCAD-F      | CCACCCTCTTGAGCCTTAC      |
|                                     |                       |                    | qCAD-R      | TCCTTGATGCTCCCGATAA      |
| <i>FsCCR</i>                        | TRINITY_DN734_c0_g1   | 184                | qCCR-F      | GCAGCAGTATGGAGACAAA      |
|                                     |                       |                    | qCCR-R      | GACCAGGATTGATGGAAAC      |
| <i>FsPAL</i>                        | TRINITY_DN1686_c0_g1  | 117                | qPAL-F      | GGCTGCTCAGAACTACACG      |
|                                     |                       |                    | qPAL-R      | CACTTCAATTTGTGGGCCGA     |
| <i>UKNI</i><br>(Shen, et al., 2020) |                       | 92                 | qUKNI-F     | CAGACCAGCTTTGAGGAGTATC   |
|                                     |                       |                    | qUKNI-R     | GGCCAGAAACCAGTAGTCAATA   |
| <i>SDH</i><br>(Shen, et al., 2020)  |                       | 100                | qSDH-F      | GAAATCGTCCCAACCTCTTACC   |
|                                     |                       |                    | qSDH-R      | AGCTGTTTCAGGACAAGGTTATG  |
| <i>G6PD</i><br>(Shen, et al., 2020) |                       | 119                | qG6PD-F     | TGCTCGGGCTTGATAGAAAC     |
|                                     |                       |                    | qG6PD-R     | GAAGGACGCGGTGGATATTT     |
